# Supplementary material
Source: PubMed Central journal article supplement (PMC3679456)
Supplement: cdd201321x1.pdf [file cdd201321x1.pdf]

Supplemental Table S1. PCR primer sequences.

---

|               |         |                               |
|---------------|---------|-------------------------------|
| Cyt c1        | Forward | 5'- GCCCCAGATATAGCATTCCC-3'   |
|               | Reverse | 5'- GTTCATCCTGTCCTGCTCC-3'    |
| GAPDH         | Forward | 5'-AGGTCGGTGTGAACGGATTTG-3'   |
|               | Reverse | 5'-TGTAGACCATGTAGTTGAGGTCA-3' |
| IFN- $\gamma$ | Forward | 5'-ATGAACGCTACACACTGCATC-3'   |
|               | Reverse | 5'-CCATCCTTTTGCCAGTTCCTC-3'   |
| IL-1 $\beta$  | Forward | 5'-GCAACTGTTCTGAACTCAACT-3'   |
|               | Reverse | 5'-ATCTTTTGGGGTCCGTCAACT-3'   |
| IL-6          | Forward | 5'-TAGTCCTTCCTACCCCAATTTCC-3' |
|               | Reverse | 5'-TTGGTCCTTAGCCACTCCTTC-3'   |
| TNF           | Forward | 5'-CCCTCACACTCAGATCATCTTCT-3' |
|               | Reverse | 5'-GCTACGACGTGGGCTACAG-3'     |
| 18S           | Forward | 5'- TAGAGGGACAAGTGGCGTTC-3'   |
|               | Reverse | 5'- CGCTGAGCCAGTCAGTGT-3'     |

---
